# Supplementary material
Source: PubMed Central journal article supplement (PMC8115373)
Supplement: 1586.pdf [file 1586.pdf]

**Table 1. Patient Demographics ad Systemic Manifestations**

| Pt | Sex | Age (years) | Co-morbidities        | Respiratory symptoms/ MIS-C | Cardiopulmonary support | ICU/SIU stay (days) | CSF findings | Blood test findings                                    | Immune-therapy                        | Condition at discharge |
|----|-----|-------------|-----------------------|-----------------------------|-------------------------|---------------------|--------------|--------------------------------------------------------|---------------------------------------|------------------------|
| 1  | F   | 3.9         | -                     | -                           | -                       | 0                   | n/a          | n/a                                                    | -                                     | n/a                    |
| 2  | M   | 1.6         | -                     | -                           | -                       | 0                   | n/a          | n/a                                                    | -                                     | n/a                    |
| 3  | M   | 0.6         | Epilepsy              | -                           | -                       | SIU (4)             | Normal       | WBC↓, d-dimer↑                                         | -                                     | Improved               |
| 4  | M   | 16.4        | -                     | -                           | -                       | 0                   | n/a          | PTT↑, procalcitonin↓                                   | -                                     | Improved               |
| 5  | M   | 0.9         | -                     | -                           | -                       | SIU (1)             | n/a          | WBC↓                                                   | -                                     | Good                   |
| 6  | M   | 0.8         | -                     | R                           | -                       | SIU (1)             | Normal       | Normal                                                 | -                                     | Good                   |
| 7  | M   | 7.5         | Sickle-cell-disease   | R                           | MV                      | SIU (14)            | n/a          | fibrinogen↑, d-dimer↑, WBC↑, ESR↑, CRP↑                | dexamethasone, IVIG, remdesivir       | Improved               |
| 8  | M   | 1.8         | -                     | -                           | -                       | 0                   | n/a          | Normal                                                 | -                                     | Good                   |
| 9  | F   | 1.3         | -                     | -                           | -                       | SIU (9)             | n/a          | WBC↑                                                   | -                                     | Improved               |
| 10 | M   | 15.4        | Sickle-cell-disease   | -                           | -                       | ICU (8)             | Normal       | PTT↑, fibrinogen↑, d-dimer↑, ESR↑                      | dexamethasone, remdesivir             | Good                   |
| 11 | M   | 16.4        | Obesity (BMI=33.6)    | R+MIS-C                     | MV+ECMO                 | ICU (25)            | n/a          | PTT↑, fibrinogen↑, d-dimer↑, WBC↑, CRP↑, ferritin↑     | IV methylprednisolone, IVIG, anakinra | Improved               |
| 12 | F   | 17.8        | -                     | -                           | -                       | 0                   | n/a          | n/a                                                    | -                                     | Improved               |
| 13 | F   | 17.0        | Obesity (BMI=42.0)    | -                           | -                       | 0                   | n/a          | Normal                                                 | -                                     | Good                   |
| 14 | F   | 17.2        | Hemophilia-C          | -                           | -                       | 0                   | n/a          | PTT↑, WBC↑                                             | -                                     | Good                   |
| 15 | F   | 9.5         | -                     | R+MIS-C                     | MV-ECMO                 | ICU (10)            | n/a          | PTT↑, d-dimer↑, CRP↑, ferritin↑                        | anakinra                              | Improved               |
| 16 | M   | 13.1        | -                     | MIS-C                       | -                       | SIU (3)             | n/a          | fibrinogen↑, d-dimer↑, CRP↑, ferritin↑, procalcitonin↑ | IVIG, methylprednisolone              | Improved               |
| 17 | M   | 17.5        | Overweight (BMI=28.4) | R+MIS-C                     | MV                      | ICU (11)            | n/a          | troponin↑, CRP↑, BNP↑, WBC↑                            | IVIG, anakinra, solumedrol            | Improved               |
| 18 | F   | 1.5         | Sturge-Weber-Syndrome | -                           | -                       | 0                   | n/a          | Normal                                                 | -                                     | Improved               |
| 19 | F   | 9.6         | -                     | MIS-C                       | -                       | ICU (2)             | n/a          | CK↑, troponin↑, d-dimer↑, BNP↑                         | -                                     | Improved               |
| 20 | M   | 6.9         | Autism                | -                           | -                       | 0                   | n/a          | n/a                                                    | -                                     | Improved               |

BMI=body-mass-index (kg/m<sup>2</sup>); BNP=brain-natriuretic-peptide; CRP=C-reactive-protein; CSF= cerebrospinal-fluid; ECMO=extracorporeal-membrane-oxygenation; ESR=erythrocyte-sedimentation-rate; F=female; ICU= intensive-care-unit; IVIG= intravenous-immune-globulin; M= male; MIS-C= multisystem-inflammatory-syndrome-in-children; MV=mechanical-ventilation; PTT=partial-thromboplastin-time; SIU=special-isolation-unit; WBC=white-blood-cell
